# Supplementary material
Source: PubMed Central journal article supplement (PMC9582969)
Supplement: jamasurg-e224718-s001.pdf [file jamasurg-e224718-s001.pdf]

## Supplementary Online Content

Pierce JG, Ricon R, Rukmangadhan S, et al. Adherence to the TQIP palliative care guidelines among patients with serious illness at a level I trauma center in the US. *JAMA Surg*. Published online October 19, 2022. doi:10.1001/jamasurg.2022.4718

**eFigure.** Flow Diagram of Subject Selection and Goals of Care (GOC) Chart Review

**eTable 1.** Definition of Goals of Care and String of Epic Search Terms Used for Manual Review

**eTable 2.** Patient Characteristics Stratified by Admission Pre- Versus Post-Guideline Integration Into Institutional Trauma Guidelines

This supplementary material has been provided by the authors to give readers additional information about their work.

**eFigure.** Flow Diagram of Subject Selection and Goals of Care (GOC) Chart Review

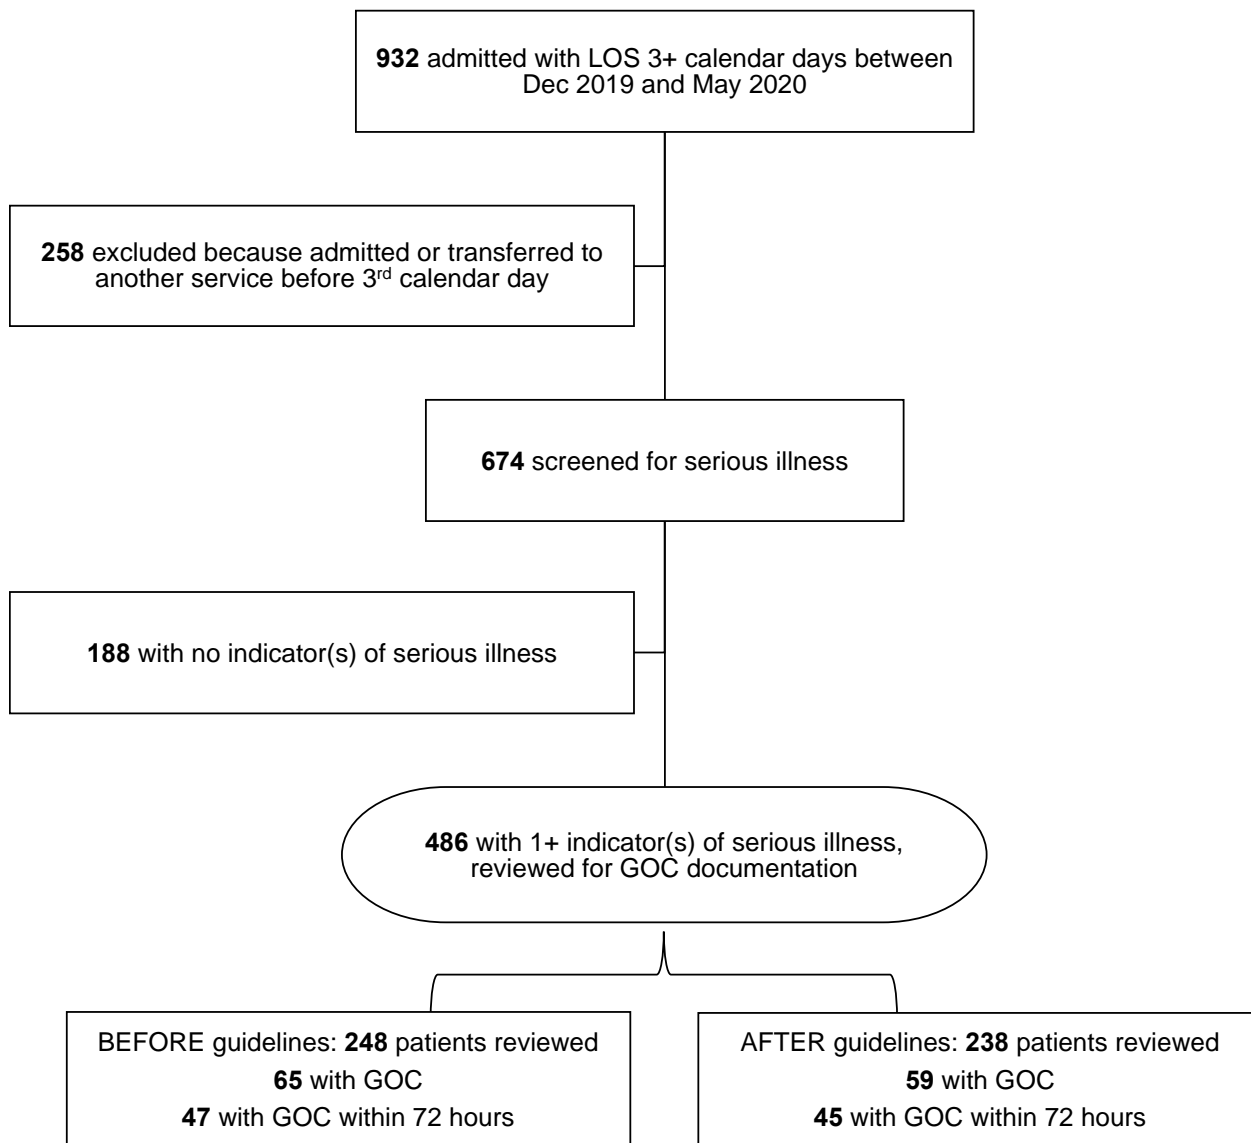

**eTable 1.** Definition of Goals of Care and String of Epic Search Terms Used for Manual Review

| Working Goals of Care Definition                                                                                                                                                                                                                                                                                                                                                                                                                                                                                                                                                                                                                                                                                                                                                                                     | EPIC Chart Search Terms                                                                                                                                                                                                                                                                                                                                                                                                                                                                                                                                                                                                                                                                                                                                                                                                                                                                                                                           |
|----------------------------------------------------------------------------------------------------------------------------------------------------------------------------------------------------------------------------------------------------------------------------------------------------------------------------------------------------------------------------------------------------------------------------------------------------------------------------------------------------------------------------------------------------------------------------------------------------------------------------------------------------------------------------------------------------------------------------------------------------------------------------------------------------------------------|---------------------------------------------------------------------------------------------------------------------------------------------------------------------------------------------------------------------------------------------------------------------------------------------------------------------------------------------------------------------------------------------------------------------------------------------------------------------------------------------------------------------------------------------------------------------------------------------------------------------------------------------------------------------------------------------------------------------------------------------------------------------------------------------------------------------------------------------------------------------------------------------------------------------------------------------------|
| <p>Conversations led by a physician or advanced practice provider (i.e. NP) on the primary team (Trauma or Surgical ICU) with patients or their surrogate decision-makers about the patient's prognosis, illness understanding, or the patient's general goals and values for medical treatment, including topics such as preferences or decisions about the use of or limitation(s) on specific life-sustaining medical interventions (e.g. cardiopulmonary resuscitation, intubation, tracheostomy, gastrostomy tube placement, hemodialysis), identification of a surrogate decision-maker, or acceptable long-term disposition (e.g. long term stay in a nursing facility; excludes standard discharge planning conversations). Includes documented statements that a discussion occurred (e.g. by nursing).</p> | <p>("goals of care" or "goals for care" or "GOC" or "met with" or "met w/" or "meeting" or "d/w" or "spoke with" or "spoke to" or "talked with" or "talked to" or "conversation" or "conference" or "per family" or "quality of life" or "QOL" or "supportive care" or "comfort measures" or "comfort directed care" or "ACP" or "preference" or "prefer" or "DNR" or "DNI" or "health care proxy") or cardiopulmonary resuscitation or code status or understanding or worry or fear or patient goals or with goals or family goals or patient values or family conference or family meeting or family discussion or discuss or surrogate or caregiver or mother or father or daughter or son or sister or brother or "NOK" or next of kin or decision or prognosis or prognostic or advance care planning or end of life or withdraw of care or escalation or comfort approach or comfort care or focus on comfort or palliative or hospice</p> |

**eTable 2.** Patient Characteristics Stratified by Admission Pre- Versus Post-Guideline Integration Into Institutional Trauma Guidelines

| Variable                                      | Pre vs Post Guideline Cohort |                      |                       | p-value    |
|-----------------------------------------------|------------------------------|----------------------|-----------------------|------------|
|                                               | All<br>N=486                 | Pre<br>n=248 (51.0%) | Post<br>n=238 (49.0%) |            |
| Age, mean (SD), years                         | 60.9 (21.3)                  | 62.5 (21.5)          | 59.4 (21.0)           | .11        |
| Male, No. (%)                                 | 328 (67.5)                   | 167 (67.3)           | 161 (67.6)            | .94        |
| Race, No. (%)                                 |                              |                      |                       | .95        |
| African American or Black                     | 41 (8.4)                     | 20 (8.1)             | 21 (8.8)              |            |
| Asian/Pacific Islander                        | 24 (4.9)                     | 13 (5.2)             | 11 (4.6)              |            |
| White                                         | 266 (54.7)                   | 139 (56.0)           | 127 (53.4)            |            |
| Other                                         | 128 (26.3)                   | 62 (25.0)            | 66 (27.7)             |            |
| Unknown/Not Reported                          | 27 (5.6)                     | 14 (5.6)             | 13 (5.5)              |            |
| Ethnicity (Hispanic or Latino), No. (%)       | 71 (14.6)                    | 36 (14.5)            | 35 (14.7)             | .57        |
| Non-English, Preferred Language, No. (%)      | 34 (7.0)                     | 22 (8.9)             | 12 (5.0)              | .10        |
| Mechanism of Injury                           |                              |                      |                       | .08        |
| Penetrating                                   | 52 (10.7)                    | 24 (9.7)             | 28 (11.8)             |            |
| Fall                                          | 253 (52.1)                   | 139 (56.1)           | 114 (47.9)            |            |
| Motor vehicle traffic                         | 147 (30.3)                   | 74 (29.8)            | 73 (30.7)             |            |
| Other blunt                                   | 34 (7.0)                     | 11 (4.4)             | 23 (9.7)              |            |
| Injury Severity Score (ISS), mean (SD)        | 16.9 (12.3)                  | 16.9 (12.4)          | 16.8 (12.2)           | .91        |
| Mechanical Ventilation Present, No. (%)       | 124 (25.5)                   | 60 (24.2)            | 64 (26.9)             | .50        |
| Presence of Serious Illness, No. (%)          | -                            | -                    | -                     |            |
| ASA IV/V                                      | 110 (22.6)                   | 45 (18.1)            | 65 (27.3)             | <b>.02</b> |
| Vulnerable elder                              | 156 (32.1)                   | 84 (33.9)            | 72 (30.3)             | .39        |
| a. Age > 84 years                             | 75 (15.4)                    | 43 (17.3)            | 32 (13.4)             | .24        |
| b. Age > 64 years with disability             | 81 (16.7)                    | 41 (16.5)            | 40 (16.8)             | .94        |
| Disseminated cancer                           | 13 (2.7)                     | 4 (1.6)              | 9 (3.8)               | .17        |
| Chronic obstructive pulmonary disease         | 68 (14.0)                    | 38 (15.3)            | 30 (12.6)             | .39        |
| Congestive heart failure                      | 58 (11.9)                    | 28 (11.3)            | 30 (12.6)             | .65        |
| Cirrhosis                                     | 26 (5.3)                     | 11 (4.4)             | 15 (6.3)              | .36        |
| End-stage renal disease                       | 12 (2.5)                     | 8 (3.2)              | 4 (1.7)               | .38        |
| Dementia                                      | 56 (11.5)                    | 32 (12.9)            | 24 (10.1)             | .33        |
| Frailty                                       | 193 (39.7)                   | 107 (43.1)           | 86 (36.1)             | .11        |
| Critical trauma                               | 341 (70.2)                   | 171 (69.0)           | 170 (71.4)            | .55        |
| a. Severe traumatic brain injury              | 170 (35.0)                   | 87 (35.1)            | 83 (34.9)             | .96        |
| AIS 3+                                        | 170 (35.0)                   | 87 (35.1)            | 83 (34.9)             | .96        |
| GCS 3-8                                       | 17 (3.5)                     | 10 (4.0)             | 7 (2.9)               | .51        |
| b. Critical injury                            | 293 (60.3)                   | 147 (59.3)           | 146 (61.3)            | .64        |
| ISS > 25                                      | 91 (18.7)                    | 50 (20.2)            | 41 (17.2)             | .41        |
| ICU > 24 hours                                | 280 (57.6)                   | 137 (55.2)           | 143 (60.1)            | .28        |
| Admitted from skilled nursing                 | 11 (2.3)                     | 7 (2.8)              | 4 (1.7)               | .55        |
| 2+ Indicators of Serious Illness, No. (%)     | 292 (60.1)                   | 151 (60.9)           | 141 (59.2)            | .71        |
| Palliative Care Consult, No. (%)              | 51 (10.5)                    | 27 (10.9)            | 24 (10.1)             | .77        |
| Prior Advance Care Planning Document, No. (%) | 58 (11.9)                    | 34 (13.7)            | 24 (10.1)             | .23        |
| DNR Code Status, No. (%)                      | 56 (11.5)                    | 33 (13.3)            | 23 (9.7)              | .21        |
| Hospital Length of Stay, median (IQR), days   | 7 (4-12)                     | 7 (5-11)             | 7 (4-12)              | .93        |
| Discharge Disposition, No. (%)                |                              |                      |                       | <b>.02</b> |
| Home                                          | 224 (46.1)                   | 99 (39.9)            | 125 (52.5)            |            |
| Non-home facility                             | 196 (40.3)                   | 107 (43.1)           | 89 (37.4)             |            |
| Died                                          | 24 (4.9)                     | 17 (6.9)             | 7 (2.9)               |            |
| Other                                         | 42 (8.6)                     | 25 (10.1)            | 17 (7.1)              |            |
